# Supplementary material for: The Relationship between Future Anxiety Due to COVID-19 and Vigilance: The Role of Message Fatigue and Autonomy Satisfaction
Source: MDPI journal article supplement (doi:10.3390/ijerph19031062), 2022-01-18
Supplement: s1 [file s1]

Table S1.

*Bivariate Correlations among Measured Variables*

| Variable | FAN                 | MFG                 | VIG                 | AUT                | AGE                 | GEN               | EDU                | INC                | RAC                 | POL                | DTH  | VAC               | ERS |
|----------|---------------------|---------------------|---------------------|--------------------|---------------------|-------------------|--------------------|--------------------|---------------------|--------------------|------|-------------------|-----|
| FAN      |                     |                     |                     |                    |                     |                   |                    |                    |                     |                    |      |                   |     |
| MFG      | .11 <sup>*</sup>    |                     |                     |                    |                     |                   |                    |                    |                     |                    |      |                   |     |
| VIG      | .15 <sup>***</sup>  | -.45 <sup>***</sup> |                     |                    |                     |                   |                    |                    |                     |                    |      |                   |     |
| AUT      | -.12 <sup>**</sup>  | .05                 | .15 <sup>***</sup>  |                    |                     |                   |                    |                    |                     |                    |      |                   |     |
| AGE      | -.19 <sup>***</sup> | .01                 | -.10 <sup>*</sup>   | .08                |                     |                   |                    |                    |                     |                    |      |                   |     |
| GEN      | -.05                | .03                 | .03                 | -.01               | -.05                |                   |                    |                    |                     |                    |      |                   |     |
| EDU      | .07                 | -.06                | .10 <sup>*</sup>    | .003               | -.09 <sup>*</sup>   | -.04              |                    |                    |                     |                    |      |                   |     |
| INC      | -.04                | -.03                | .16 <sup>***</sup>  | .11 <sup>*</sup>   | -.04                | -.10 <sup>*</sup> | .44 <sup>***</sup> |                    |                     |                    |      |                   |     |
| RAC      | .01                 | -.11 <sup>*</sup>   | .12 <sup>**</sup>   | -.03               | -.14 <sup>**</sup>  | -.01              | -.004              | -.01               |                     |                    |      |                   |     |
| POL      | .10 <sup>*</sup>    | -.36 <sup>***</sup> | .32 <sup>***</sup>  | -.12 <sup>**</sup> | -.21 <sup>***</sup> | -.01              | .07                | -.03               | .07                 |                    |      |                   |     |
| DTH      | .09 <sup>*</sup>    | -.04                | .05                 | -.06               | -.03                | .05               | .02                | .03                | .09 <sup>*</sup>    | .08                |      |                   |     |
| VAC      | .07                 | -.22 <sup>***</sup> | .31 <sup>***</sup>  | -.03               | .05                 | -.09 <sup>*</sup> | .24 <sup>***</sup> | .20 <sup>***</sup> | .04                 | .23 <sup>***</sup> | .09  |                   |     |
| ERS      | -.14 <sup>**</sup>  | .18 <sup>***</sup>  | -.28 <sup>***</sup> | .03                | .08                 | .09 <sup>*</sup>  | .03                | .02                | -.18 <sup>***</sup> | -.09               | -.04 | -.09 <sup>*</sup> |     |

\*  $p < .05$ ; \*\* $p < .01$ ; \*\*\* $p < .001$ .

FAN = Future Anxiety

MFG = Message Fatigue

VIG = Vigilance

AUT = Autonomy Satisfaction

AGE = Age

GEN = Gender

EDU = Education

INC = Income

RAC = Race

POL = Political Orientation

DTH = COVID death

VAC = Vaccination

ERS = Eased Restrictions.
